# Supplementary material for: 11-Mercaptoundecanoic acid directed one-pot synthesis of water-soluble fluorescent gold nanoclusters and their use as probes for sensitive and selective detection of Cr3+and Cr6+
Source: Royal Society of Chemistry journal article supplement (doi:10.1039/c2tc00021k), 2012-10-22
Supplement: c2tc00021k.pdf [file c2tc00021k.pdf]

## Electronic Supplementary Information (ESI)

# **11-Mercaptoundecanoic Acid-Directed One-Pot Synthesis of Water-Soluble Fluorescent Gold Nanoclusters and Their Use as Probes for Sensitive and Selective Detection of Cr<sup>3+</sup> and Cr<sup>6+</sup>**

Jian Sun, Jie Zhang, and Yongdong Jin\*

*State Key Laboratory of Electroanalytical Chemistry, Changchun Institute of Applied Chemistry, Chinese Academy of Sciences, Changchun 130022, Jilin, China. Phone/fax: +86-431-85262661.*

*E-mail: [ydjin@ciac.jl.cn](mailto:ydj@ciac.jl.cn)*

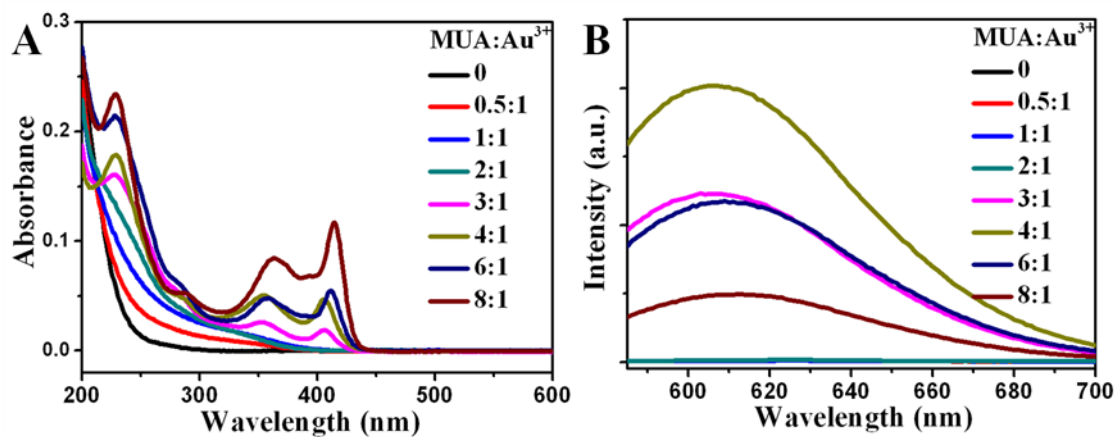

**Fig. S1** (A) UV-vis absorption spectra and (B) fluorescence emission spectra (excitation at 280 nm) of AuNCs synthesized from different ratios of 11-MUA to Au<sup>3+</sup>.

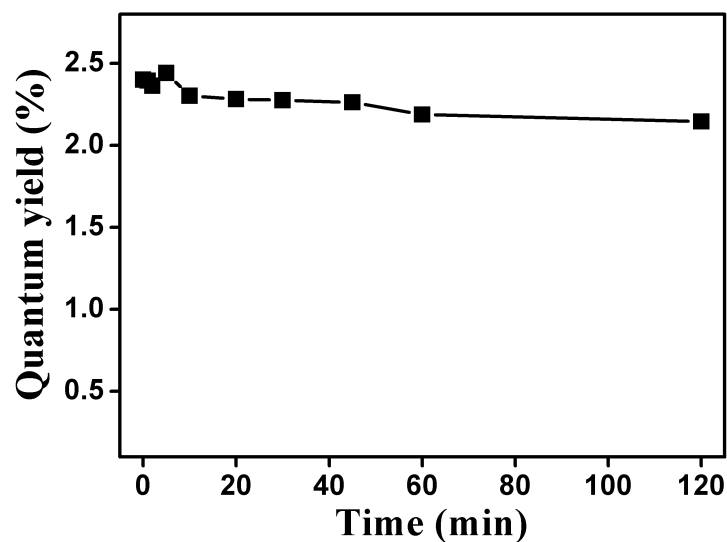

**Fig. S2** The quantum yields of the 11-MUA-AuNCs in aqueous solution measured as a function of the UV irradiation time (254 nm).
